# Supplementary material for: In Vitro Evaluation of Antiprotozoal Properties, Cytotoxicity Effect and Anticancer Activity of New Essential-Oil Based Phytoncide Mixtures
Source: MDPI journal article supplement (doi:10.3390/molecules28031395), 2023-02-01
Supplement: s1 [file s1]

# In Vitro Evaluation of Antiprotozoal Properties, Cytotoxicity Effect and Anticancer Activity of New Essential-Oil Based Phytoncide Mixtures

Table of content

**Figure S1.** MS Spectrum of unknown compound (nr 8) in clove EO: .....1

**Figure S2.** Evaluation of cytotoxicity of test oils (1 mg/mL) to normal human fibroblasts after 48 h incubation, 2

All presented in the publication GC-MS chromatograms are available under following link:

[https://drive.google.com/file/d/1LfmYecuE3QSYoeVn43-ccu0O2s\\_UcS-L/view?usp=share\\_link](https://drive.google.com/file/d/1LfmYecuE3QSYoeVn43-ccu0O2s_UcS-L/view?usp=share_link)

The NMR spectra presented in publication are available under following link:

[https://drive.google.com/file/d/1zkAnN77n6CRTGrYKynBj8GmKxt3H45I9/view?usp=share\\_link](https://drive.google.com/file/d/1zkAnN77n6CRTGrYKynBj8GmKxt3H45I9/view?usp=share_link)

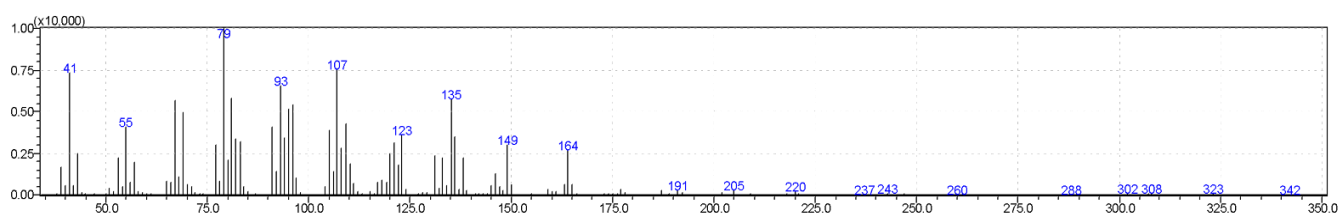

**Figure S1.** MS Spectrum of unknown compound (nr 8) in clove EO:.

CONTROL

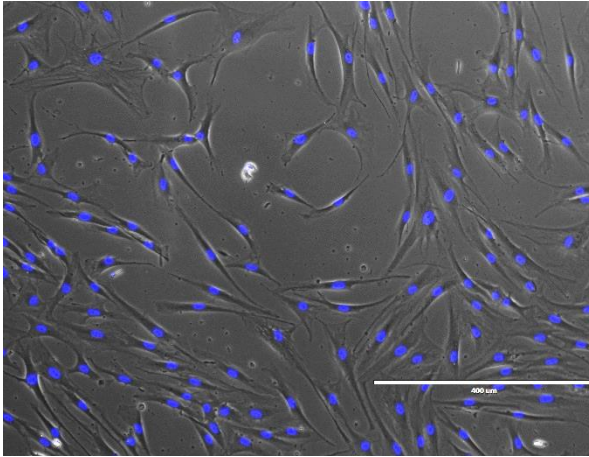

CONTROL +H<sub>2</sub>O<sub>2</sub> (2mM)

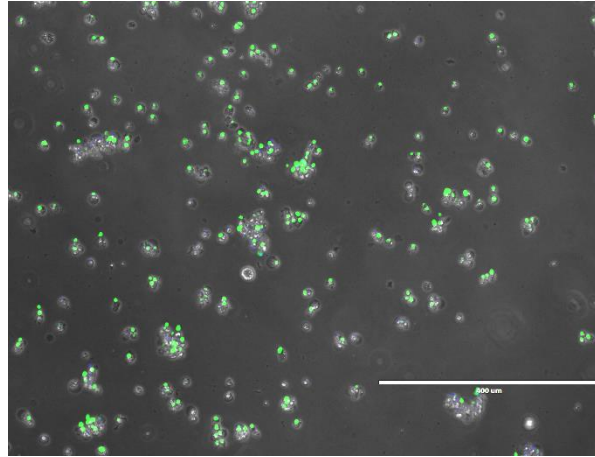

*essential oil of Ceylon cinnamon*

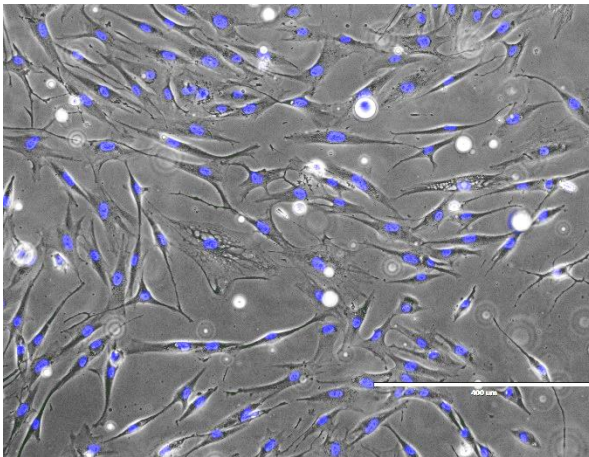

*essential oil garlic essential oil*

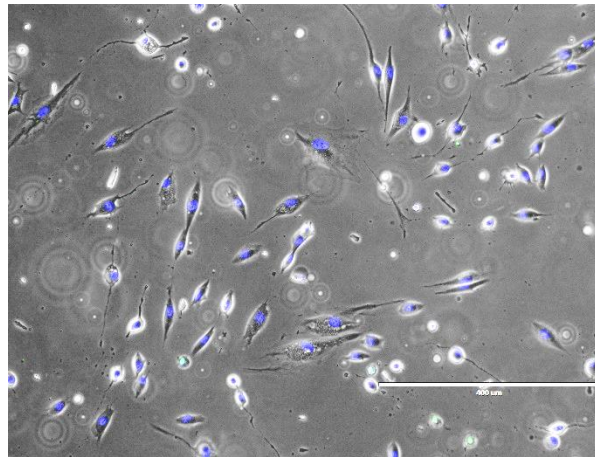

*clove essential oil*

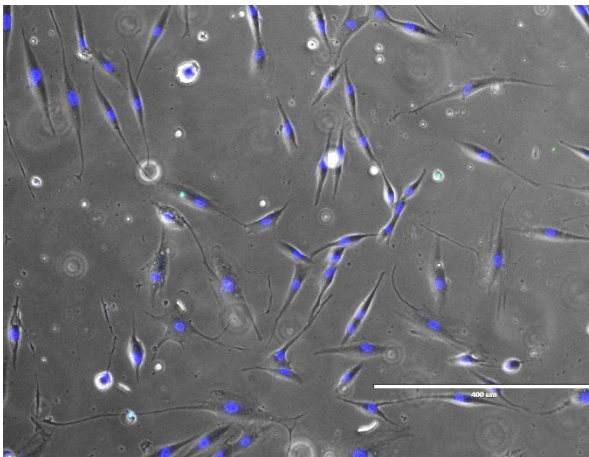

*rosemary essential oil*

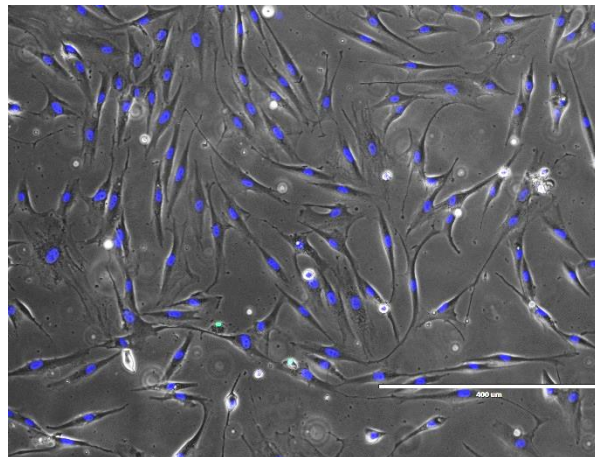

**Figure S2.** Evaluation of cytotoxicity of test oils (1 mg/mL) to normal human fibroblasts after 48 h incubation, live-dead staining, staining kit: ReadyProbes™ Cell Viability Imaging Kit, Blue/Green, blue - live, green - dead cells. Evos FL microscope, objective magnification 10x, fluorescence: DAPI: Ex: 357/44 Em: 447/60; GFP: Ex: 482/25 Em: 524/24.
